# Supplementary material
Source: Royal Society of Chemistry journal article supplement (doi:10.1039/d6ta04102g)
Supplement: d6ta04102g1.pdf [file d6ta04102g1.pdf]

# Comprehending the progressive structure of molten salt by deep potential molecular dynamics for high temperature heat storage

Heqing Tian <sup>a</sup>, Xianyou Lan <sup>a</sup>, Hongyue Yuan <sup>b</sup>, Wenguang Zhang <sup>a</sup>, Zhiyu Min <sup>b,\*</sup>

<sup>a</sup> School of Mechanical and Power Engineering, Zhengzhou University, Zhengzhou 450001, China

<sup>b</sup> Henan Province Engineering Research Center of Efficient use of new energy of low carbon technologies, Henan Mechanical and Electrical Vocational College, Zhengzhou 451191, China

## Supplementary Information

**Table S1.** Local structural characteristics of ternary eutectic salt.

| Parameters (Å)          | <i>T</i> (K) | Na-Na | Na-K  | Na-Cl | Na-O  | K-K   | K-Cl  | K-O   | Cl-Cl  | C-O   | O-O   |
|-------------------------|--------------|-------|-------|-------|-------|-------|-------|-------|--------|-------|-------|
| <i>r</i> <sub>max</sub> | 873K         | 3.737 | 4.075 | 2.702 | 2.314 | 4.389 | 3.099 | 2.722 | 4.090  | 1.308 | 2.267 |
|                         | 923K         | 3.751 | 4.078 | 2.702 | 2.312 | 4.390 | 3.096 | 2.722 | 4.112  | 1.308 | 2.267 |
|                         | 973K         | 3.759 | 4.089 | 2.698 | 2.311 | 4.391 | 3.094 | 2.715 | 4.122  | 1.308 | 2.267 |
|                         | 1023K        | 3.792 | 4.115 | 2.694 | 2.310 | 4.409 | 3.087 | 2.715 | 4.132  | 1.308 | 2.267 |
|                         | 1073K        | 3.823 | 4.139 | 2.693 | 2.309 | 4.430 | 3.084 | 2.718 | 4.166  | 1.308 | 2.267 |
| <i>r</i> <sub>min</sub> | 873K         | 6.525 | 6.775 | 4.275 | 3.375 | 5.625 | 4.575 | 3.675 | 6.375  | 1.730 | 2.675 |
|                         | 923K         | 6.475 | 6.725 | 4.125 | 3.325 | 5.575 | 4.625 | 3.725 | 6.375  | 1.780 | 2.675 |
|                         | 973K         | 6.425 | 6.725 | 4.175 | 3.375 | 5.725 | 4.675 | 3.775 | 6.425  | 1.730 | 2.675 |
|                         | 1023K        | 6.525 | 6.725 | 4.225 | 3.375 | 5.825 | 4.775 | 3.825 | 6.425  | 1.780 | 2.675 |
|                         | 1073K        | 6.525 | 6.925 | 4.175 | 3.325 | 5.825 | 4.775 | 3.825 | 6.425  | 1.780 | 2.675 |
| <i>r</i> <sub>avg</sub> | 873K         | 5.864 | 2.580 | 3.398 | 2.322 | 4.102 | 4.782 | 2.179 | 10.860 | 3.000 | 2.000 |

\* Corresponding author. E-mail: mindayu@163.com (Zhiyu Min).

|       |       |       |       |       |       |       |       |        |       |       |
|-------|-------|-------|-------|-------|-------|-------|-------|--------|-------|-------|
| 923K  | 5.864 | 2.580 | 3.398 | 2.322 | 4.102 | 4.782 | 2.179 | 10.860 | 3.000 | 2.000 |
| 973K  | 5.804 | 2.563 | 3.395 | 2.296 | 4.053 | 4.738 | 2.198 | 10.853 | 3.000 | 2.000 |
| 1023K | 5.642 | 2.492 | 3.340 | 2.256 | 3.930 | 4.640 | 2.165 | 10.627 | 3.000 | 2.000 |
| 1073K | 5.519 | 2.410 | 3.278 | 2.224 | 3.858 | 4.566 | 2.109 | 10.425 | 3.000 | 2.000 |

### Transport properties

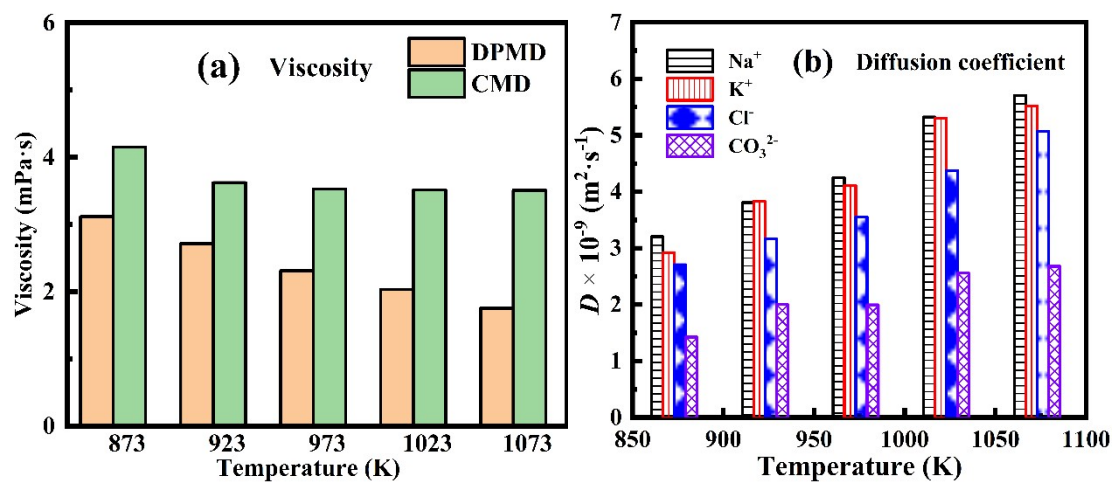

Figure S1. (a) Viscosity and (b) diffusion coefficient.
